# Supplementary material
Source: Springer Nature journal article supplement (https://www.springermedizin.de/resource/supplementary/12881_2008_434_MOESM4_ESM.pdf/9450646)

**A) Differentiation CEU vs YRI**

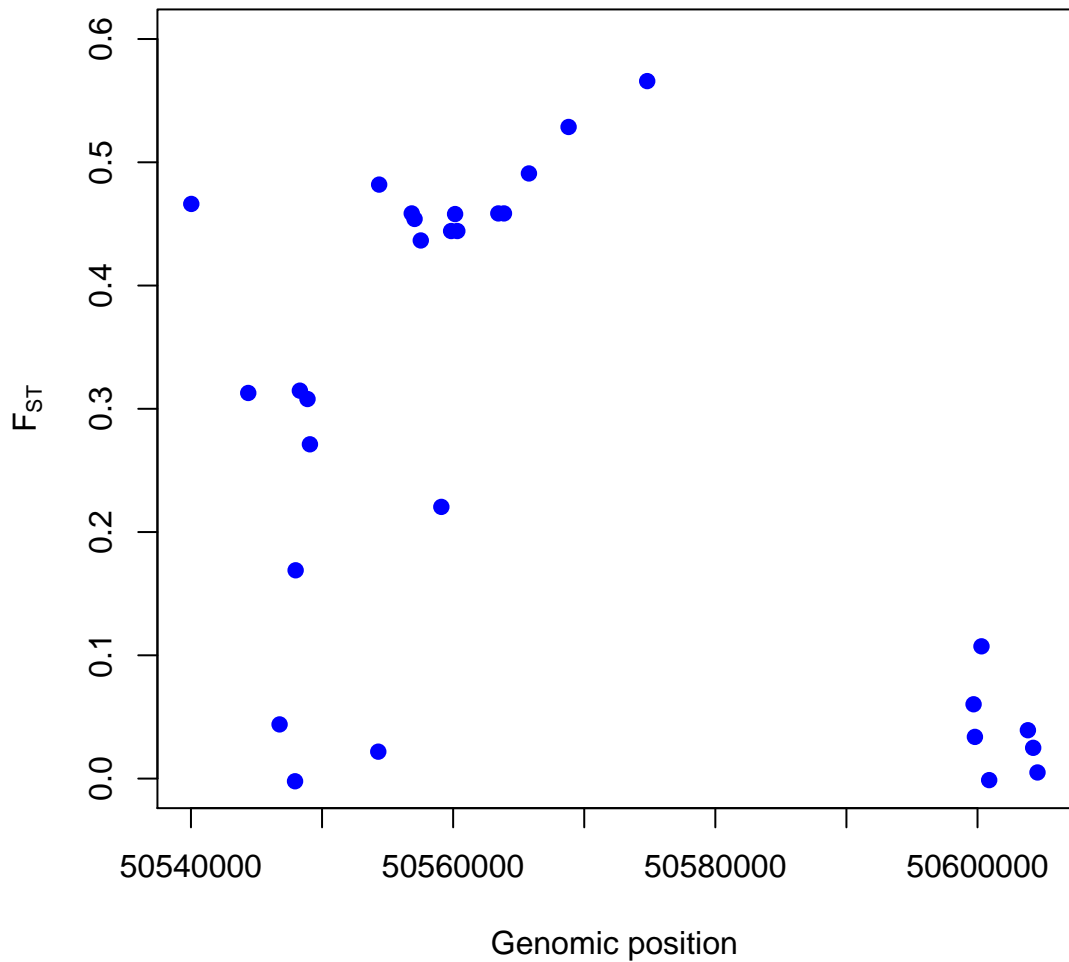

**B) Differentiation CEU vs JPT+HCB**

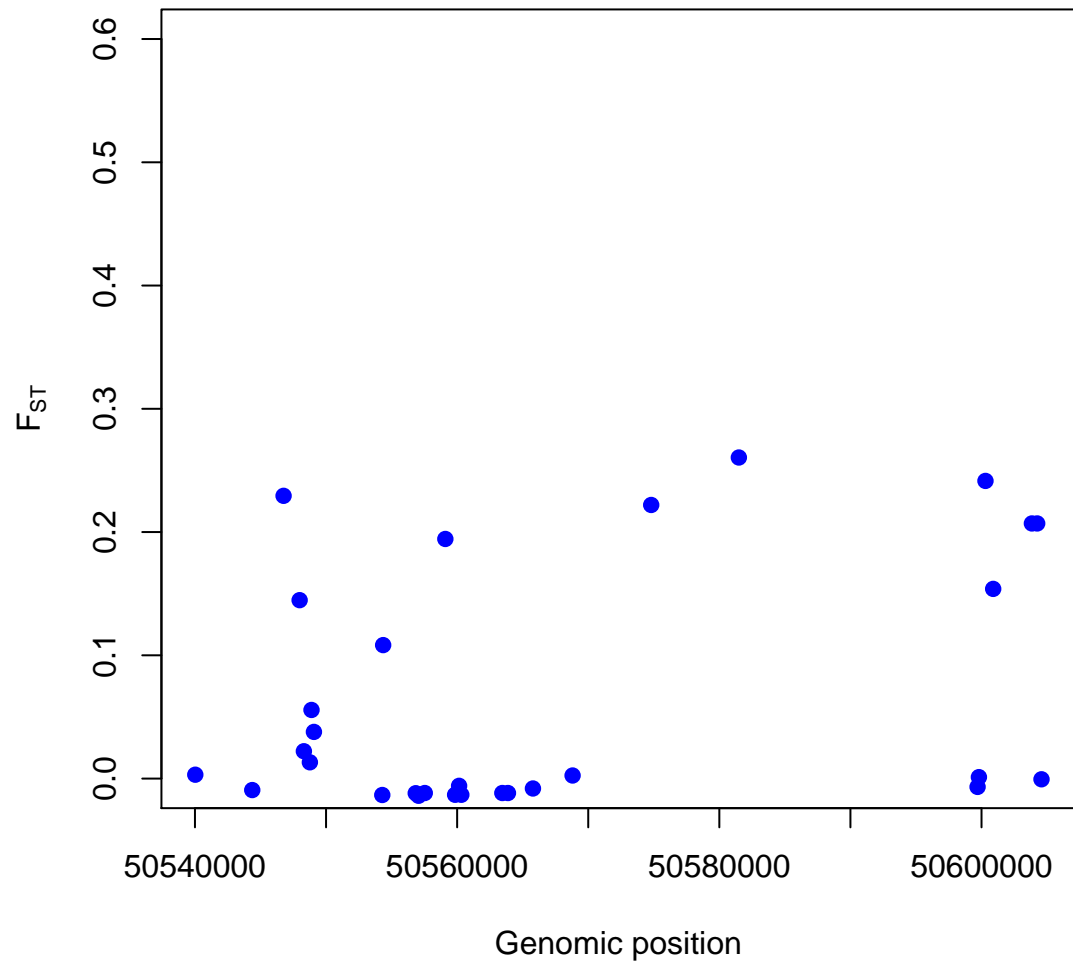

Supplement: MOESM4 [file 9450646]
